# Supplementary material
Source: PubMed Central journal article supplement (PMC4299212)
Supplement: pnas.201412984SI.pdf [file pnas.201412984SI.pdf]

# Supporting Information

Carissimo et al. 10.1073/pnas.1412984112

## SI Experimental Procedures

***P. falciparum* Gametocyte Culture and Ngouso Colony Mosquito Infection.** Parasite culture and experimental feedings with the *P. falciparum* isolate NF54 were done as previously described (1). Briefly, *P. falciparum* NF54 was cultured using the automated tipper-table system of Ponnudurai et al. (2) implemented at the Center for Production and Infection of Anopheles mosquito facility of the Institut Pasteur. Fourteen days after initiating the parasite subculture and before each infection experiment, gametocyte maturity was assessed by testing exflagellation of male microgametes.

For an infectious blood meal, 10 mL of the gametocyte culture was then centrifuged at  $500 \times g$ , and the cell pellet was resuspended in an equal volume of normal type AB human serum. The infected erythrocytes were added to fresh erythrocytes in

AB human serum and transferred into a membrane feeder warmed to 37 °C. Antibiotic-treated or untreated female mosquitoes (4–5 d old) were allowed to feed for 15 min, unfed mosquitoes were removed, and only fully engorged females were maintained on 10% sucrose with or without antibiotic solution for further analysis.

**Analysis of Infection Phenotypes.** As infection phenotypes, we analyzed oocyst prevalence and intensity. Infection prevalence is the fraction of mosquitoes carrying at least one oocyst, and intensity is the number of oocysts per mosquito midgut.

To determine infection phenotype, midguts of blood-fed females were dissected 7–8 d postinfection and stained in 1× PBS buffer with 0.4% mercury dibromofluorescein (Sigma), and the number of oocysts per midgut was determined using a light microscope.

1. Mitri C, et al. (2009) Fine pathogen discrimination within the APL1 gene family protects *Anopheles gambiae* against human and rodent malaria species. *PLoS Pathog* 5(9): e1000576.

2. Ponnudurai T, Lensen AH, Leeuwenberg AD, Meuwissen JH (1982) Cultivation of fertile *Plasmodium falciparum* gametocytes in semi-automated systems. 1. Static cultures. *Trans R Soc Trop Med Hyg* 76(6):812–818.

### Day 3 post infection

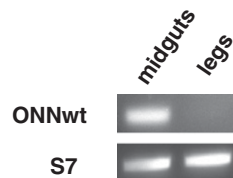

**Fig. S1.** ONNwt has not crossed the midgut escape barrier 3 d after an infectious blood meal. RNA was extracted in TRIzol from pooled midguts and legs 3 d after an infectious blood meal with ONNwt. RT was performed with Superscript II (Invitrogen) and a random hexamer, and PCR was performed with DreamTaq (Thermo Scientific) at 56 °C, annealing with primers ONN-8961F (forward) and ONN-9425R (reverse) on the ONN genome (Table S2). S7, transcripts of control, ribosomal protein S7 transcript.

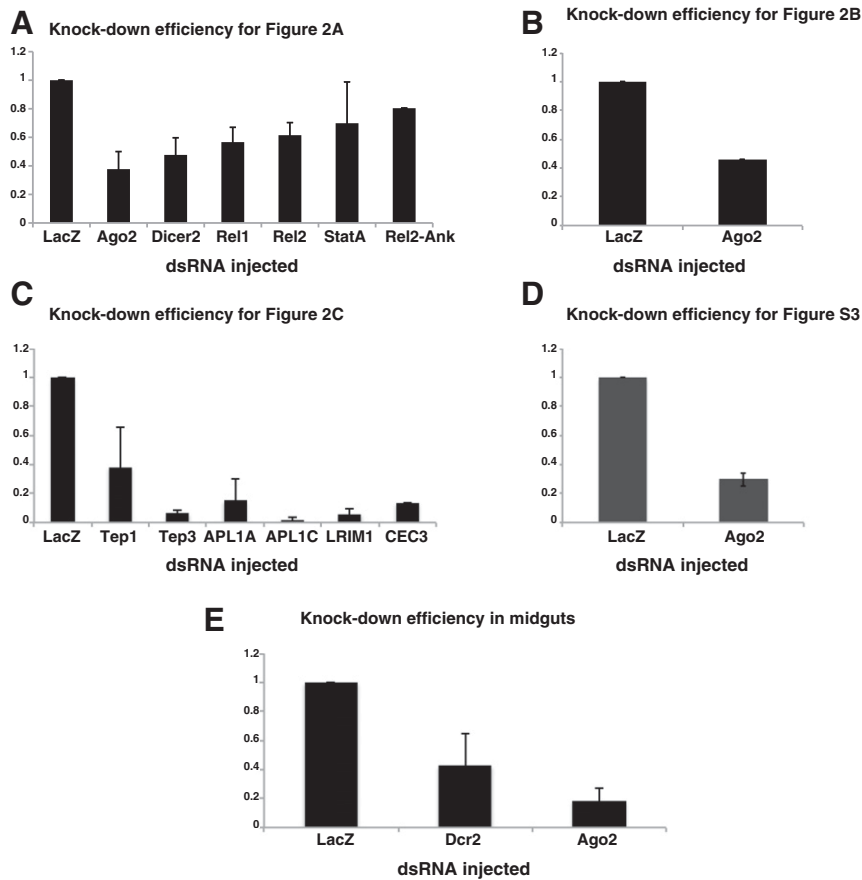

**Fig. S2.** Gene silencing efficiency is equivalent in whole mosquitoes and midguts. (A–D) Transcript levels of genes targeted by dsRNA injection were assessed in pools of five mosquitoes at the time of ONNV infection. Transcripts were quantified using the  $2^{-\Delta\Delta Ct}$  (cycle threshold) method utilizing ribosomal protein S7 (rpS7) control RNA. (E) Transcript levels of genes targeted by dsRNA injection were assessed in pools of five dissected midguts 2–3 d postinjection of dsRNA, indicating that gene silencing was efficient in the midgut. LacZ, irrelevant control dsRNA targeting the *E. coli* lacZ gene encoding  $\beta$ -galactosidase.

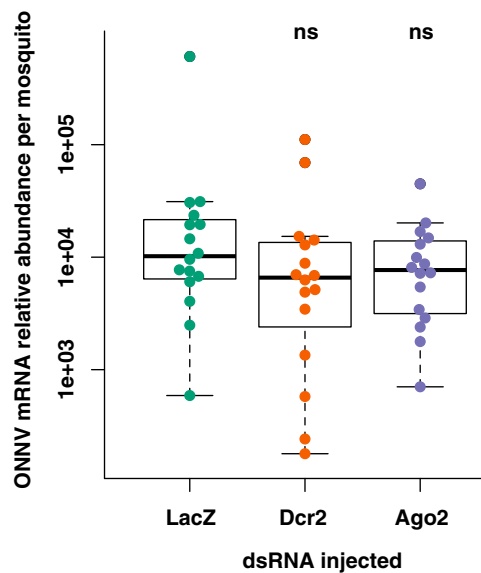

**Fig. S3.** Silencing of the siRNA pathway does not increase ONNV mRNA quantity. All mosquitoes that took blood are represented in the figure. Viral RNA relative abundance was quantified using the  $2^{-\Delta\Delta Ct}$  method utilizing rpS7 control RNA. Total RNA from individual mosquitoes was extracted from the samples in one of the replicates of the experiment shown in Fig. 2, which showed that silencing of siRNA components also did not lead to increased viral titers. LacZ, irrelevant control dsRNA targeting the *E. coli* lacZ gene encoding  $\beta$ -galactosidase; ns, not significant.

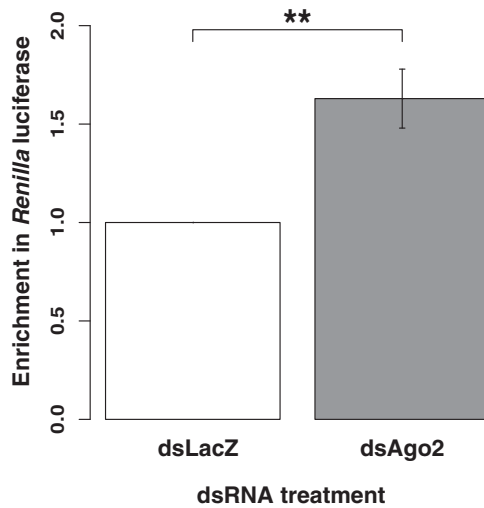

**Fig. S4.** Exogenous siRNA pathway displays antiviral activity in cultured anopheline 4A3A cells. Cells treated with dsRNA control or directed against Ago2 were infected with ONN-*RLuc* at a multiplicity of infection of 1. Viral replication was assessed by *RLuc* activity quantification.  $**P < 0.005$ . dsLacZ, irrelevant control dsRNA targeting the *E. coli lacZ* gene encoding  $\beta$ -galactosidase.

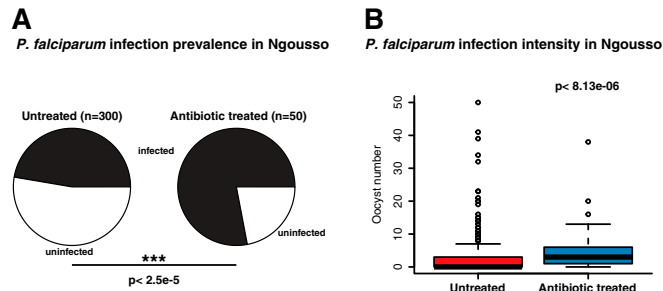

**Fig. S5.** Antibiotic treatment increases susceptibility of the *An. gambiae* Nguosso strain to *P. falciparum* infection (NF54 strain). Mosquitoes from the same colony used for all ONNV experiments throughout this work were treated or not treated with antibiotics from adult emergence. (A) Oocyst prevalence 7 d after *P. falciparum* infection in *An. gambiae* Nguosso mosquitoes. (B) Oocyst intensity in the same mosquitoes.

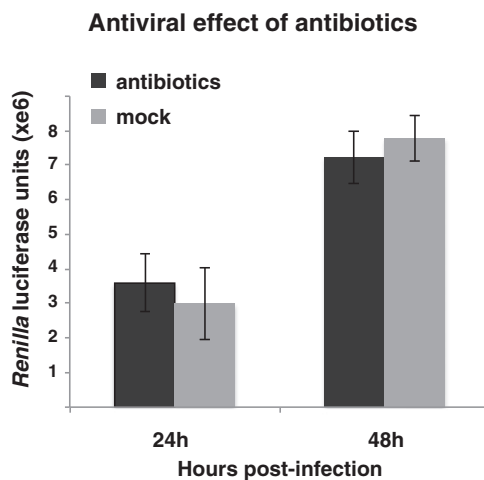

**Fig. S6.** Antibiotic treatment has no direct antiviral activity. 4A3A cells were plated with or without antibiotics (penicillin, streptomycin, and gentamicin at the concentrations used for mosquito treatment) for 24 h, and cells were then infected with ONN-*RLuc* directly in the supernatant (in contact or not in contact with antibiotics). A luciferase assay was performed in triplicate at 24 h and 48 h postinfection using the passive lysis buffer and the *Renilla*-Glo Luciferase Assay System (Promega).
